# Supplementary material
Source: Elsevier journal article supplement (https://www.sciencedirect.com/science/article/pii/S0213911119301116)
Supplement: mmc1 [file S0213911119301116:mmc1.pdf]

## RESULTADOS COMPLETOS DE LOS ANÁLISIS DE TENDENCIAS DE LA MORTALIDAD EN ESPAÑA CON REGRESIÓN JOINTPOINT

### APLICABLE A TODAS LAS TABLAS:

CPA: Cambio porcentual anual, Signo  $\wedge$  : el CPA es distinto de cero con un error alfa del 0,05;

IC: intervalo de Confianza (del CPA)

### 1) TENDENCIA DE LA MORTALIDAD GENERAL (TOTAL DE CAUSAS) EN HOMBRES POR GRUPOS DE EDAD:

#### Hombres < 1 año:

| Segmento | Año inicial | Año final | CPA           | Límite inferior IC | Límite superior IC | Tasa último año (x 10 <sup>5</sup> ) |
|----------|-------------|-----------|---------------|--------------------|--------------------|--------------------------------------|
| 1        | 1981        | 1992      | -4,3 $\wedge$ | -4,9               | -3,6               | 790                                  |
| 2        | 1992        | 1995      | -8,0          | -20,1              | 5,8                | 586                                  |
| 3        | 1995        | 2013      | -3,8 $\wedge$ | -4,1               | -3,4               | 284                                  |
| 4        | 2013        | 2016      | 0,1           | -5,7               | 6,3                | 311                                  |

#### Hombres 1-4 años:

| Segmento | Año inicial | Año final | CPA           | Límite inferior IC | Límite superior IC | Tasa último año (x 10 <sup>5</sup> ) |
|----------|-------------|-----------|---------------|--------------------|--------------------|--------------------------------------|
| 1        | 1981        | 2016      | -4,4 $\wedge$ | -4,6               | -4,2               | 15                                   |

#### Hombres 5-9 años:

| Segmento | Año inicial | Año final | CPA           | Límite inferior IC | Límite superior IC | Tasa último año (x 10 <sup>5</sup> ) |
|----------|-------------|-----------|---------------|--------------------|--------------------|--------------------------------------|
| 1        | 1981        | 2016      | -4,1 $\wedge$ | -4,3               | -3,8               | 8                                    |

#### Hombres 10-14 años:

| Segmento | Año inicial | Año final | CPA           | Límite inferior IC | Límite superior IC | Tasa último año (x 10 <sup>5</sup> ) |
|----------|-------------|-----------|---------------|--------------------|--------------------|--------------------------------------|
| 1        | 1981        | 2004      | -2,9 $\wedge$ | -3,2               | -2,6               | 18                                   |
| 2        | 2004        | 2016      | -5,7 $\wedge$ | -6,5               | -4,8               | 9                                    |

### Hombres 15-19 años:

| Segmento | Año inicial | Año final | CPA    | Límite inferior IC | Límite superior IC | Tasa último año (x 10 <sup>5</sup> ) |
|----------|-------------|-----------|--------|--------------------|--------------------|--------------------------------------|
| 1        | 1981        | 1990      | 3,6^   | 2,6                | 4,6                | 94                                   |
| 2        | 1990        | 1994      | -10,7^ | -16,1              | -4,9               | 61                                   |
| 3        | 1994        | 2000      | 0,5    | -2,0               | 3,0                | 64                                   |
| 4        | 2000        | 2007      | -3,4^  | -5,2               | -1,6               | 50                                   |
| 5        | 2007        | 2012      | -13,9^ | -17,0              | -10,7              | 25                                   |
| 6        | 2012        | 2016      | -0,5   | -4,2               | 3,3                | 23                                   |

### Hombres 20-24 años:

| Segmento | Año inicial | Año final | CPA   | Límite inferior IC | Límite superior IC | Tasa último año (x 10 <sup>5</sup> ) |
|----------|-------------|-----------|-------|--------------------|--------------------|--------------------------------------|
| 1        | 1981        | 1990      | 5,5^  | 4,1                | 6,8                | 160                                  |
| 2        | 1990        | 1997      | -8,3^ | -10,4              | -6,2               | 85                                   |
| 3        | 1997        | 2003      | -0,9  | -3,9               | 2,2                | 84                                   |
| 4        | 2003        | 2013      | -8,0^ | -9,1               | -6,8               | 36                                   |
| 5        | 2013        | 2016      | -1,5  | -8,1               | 5,4                | 35                                   |

### Hombres 25-29 años:

| Segmento | Año inicial | Año final | CPA    | Límite inferior IC | Límite superior IC | Tasa último año (x 10 <sup>5</sup> ) |
|----------|-------------|-----------|--------|--------------------|--------------------|--------------------------------------|
| 1        | 1981        | 1985      | 1,9    | -1,7               | 5,7                | 121                                  |
| 2        | 1985        | 1991      | 9,7^   | 6,9                | 12,6               | 201                                  |
| 3        | 1991        | 1995      | -5,3   | -10,6              | 0,3                | 167                                  |
| 4        | 1995        | 1998      | -11,4^ | -21,1              | -0,6               | 110                                  |
| 5        | 1998        | 2014      | -6,3^  | -6,8               | -5,8               | 40                                   |
| 6        | 2014        | 2016      | 3,5    | -7,8               | 16,2               | 42                                   |

### Hombres 30-34 años:

| Segmento | Año inicial | Año final | CPA    | Límite inferior IC | Límite superior IC | Tasa último año (x 10 <sup>5</sup> ) |
|----------|-------------|-----------|--------|--------------------|--------------------|--------------------------------------|
| 1        | 1981        | 1986      | 1,2    | -1,1               | 3,6                | 130                                  |
| 2        | 1986        | 1991      | 10,3^  | 6,7                | 14,1               | 211                                  |
| 3        | 1991        | 1995      | 4,4    | -1,0               | 10,0               | 246                                  |
| 4        | 1995        | 1998      | -14,4^ | -22,9              | -4,9               | 152                                  |
| 5        | 1998        | 2011      | -7,4^  | -8,0               | -6,9               | 59                                   |
| 6        | 2011        | 2016      | -1,7   | -4,0               | 0,6                | 56                                   |

### Hombres 35-39 años:

| Segmento | Año inicial | Año final | CPA   | Límite inferior IC | Límite superior IC | Tasa último año (x 10 <sup>5</sup> ) |
|----------|-------------|-----------|-------|--------------------|--------------------|--------------------------------------|
| 1        | 1981        | 1995      | 2,6^  | 2,2                | 3,1                | 241                                  |
| 2        | 1995        | 2004      | -4,6^ | -5,5               | -3,6               | 157                                  |
| 3        | 2004        | 2014      | -7,9^ | -8,7               | -7,1               | 65                                   |
| 4        | 2014        | 2016      | 3,0   | -6,1               | 13,0               | 69                                   |

### Hombres 40-44 años:

| Segmento | Año inicial | Año final | CPA   | Límite inferior IC | Límite superior IC | Tasa último año (x 10 <sup>5</sup> ) |
|----------|-------------|-----------|-------|--------------------|--------------------|--------------------------------------|
| 1        | 1981        | 1995      | 0,2   | -0,2               | 0,6                | 272                                  |
| 2        | 1995        | 2005      | -2,1^ | -2,9               | -1,3               | 216                                  |
| 3        | 2005        | 2016      | -6,1^ | -6,6               | -5,5               | 114                                  |

### Hombres 45-49 años:

| Segmento | Año inicial | Año final | CPA   | Límite inferior IC | Límite superior IC | Tasa último año (x 10 <sup>5</sup> ) |
|----------|-------------|-----------|-------|--------------------|--------------------|--------------------------------------|
| 1        | 1981        | 1994      | -0,5^ | -0,8               | -0,2               | 272                                  |
| 2        | 1994        | 2004      | -1,4^ | -1,9               | -0,9               | 216                                  |
| 3        | 2004        | 2016      | -3,9^ | -4,2               | -3,5               | 114                                  |

### Hombres 50-54 años:

| Segmento | Año inicial | Año final | CPA   | Límite inferior IC | Límite superior IC | Tasa último año (x 10 <sup>5</sup> ) |
|----------|-------------|-----------|-------|--------------------|--------------------|--------------------------------------|
| 1        | 1981        | 1983      | -2,6  | -6,0               | 1,0                | 666                                  |
| 2        | 1983        | 1990      | -0,2  | -0,8               | 0,4                | 662                                  |
| 3        | 1990        | 1994      | -2,6^ | -4,3               | -0,8               | 587                                  |
| 4        | 1994        | 2005      | -1,0^ | -1,3               | -0,7               | 529                                  |
| 5        | 2005        | 2016      | -2,8^ | -3,0               | -2,6               | 394                                  |

### Hombres 55-59 años:

| Segmento | Año inicial | Año final | CPA   | Límite inferior IC | Límite superior IC | Tasa último año (x 10 <sup>5</sup> ) |
|----------|-------------|-----------|-------|--------------------|--------------------|--------------------------------------|
| 1        | 1981        | 1992      | -0,9^ | -1,2               | -0,6               | 973                                  |
| 2        | 1992        | 2016      | -1,8^ | -1,9               | -1,7               | 629                                  |

#### Hombres 60-64 años:

| Segmento | Año inicial | Año final | CPA   | Límite inferior IC | Límite superior IC | Tasa último año (x 10 <sup>5</sup> ) |
|----------|-------------|-----------|-------|--------------------|--------------------|--------------------------------------|
| 1        | 1981        | 1999      | -1,4^ | -1,5               | -1,2               | 1380                                 |
| 2        | 1999        | 2010      | -2,3^ | -2,6               | -2,0               | 1047                                 |
| 3        | 2010        | 2016      | -1,1^ | -1,7               | -0,4               | 989                                  |

#### Hombres 65-69:

| Segmento | Año inicial | Año final | CPA   | Límite inferior IC | Límite superior IC | Tasa último año (x 10 <sup>5</sup> ) |
|----------|-------------|-----------|-------|--------------------|--------------------|--------------------------------------|
| 1        | 1981        | 1991      | -1,1^ | -1,3               | -0,8               | 2434                                 |
| 2        | 1991        | 2004      | -1,8^ | -2,0               | -1,6               | 1887                                 |
| 3        | 2004        | 2010      | -3,4^ | -4,3               | -2,6               | 1550                                 |
| 4        | 2010        | 2016      | -0,8^ | -1,5               | -0,2               | 1479                                 |

#### Hombres 70-74:

| Segmento | Año inicial | Año final | CPA   | Límite inferior IC | Límite superior IC | Tasa último año (x 10 <sup>5</sup> ) |
|----------|-------------|-----------|-------|--------------------|--------------------|--------------------------------------|
| 1        | 1981        | 1999      | -1,4^ | -1,5               | -1,3               | 3489                                 |
| 2        | 1999        | 2014      | -2,7^ | -2,8               | -2,6               | 2267                                 |
| 3        | 2014        | 2016      | -0,3  | -5,2               | 4,7                | 2242                                 |

#### Hombres 75-79:

| Segmento | Año inicial | Año final | CPA   | Límite inferior IC | Límite superior IC | Tasa último año (x 10 <sup>5</sup> ) |
|----------|-------------|-----------|-------|--------------------|--------------------|--------------------------------------|
| 1        | 1981        | 2002      | -1,3^ | -1,4               | -1,2               | 5351                                 |
| 2        | 2002        | 2011      | -3,0^ | -3,5               | -2,6               | 4077                                 |
| 3        | 2011        | 2016      | -1,2^ | -2,3               | -0,1               | 3779                                 |

#### Hombres 80-84:

| Segmento | Año inicial | Año final | CPA   | Límite inferior IC | Límite superior IC | Tasa último año (x 10 <sup>5</sup> ) |
|----------|-------------|-----------|-------|--------------------|--------------------|--------------------------------------|
| 1        | 1981        | 2003      | -1,2^ | -1,3               | -1,0               | 9100                                 |
| 2        | 2003        | 2016      | -2,5^ | -2,9               | -2,2               | 6517                                 |

Hombres 85-89:

| Segmento | Año inicial | Año final | CPA   | Límite inferior IC | Límite superior IC | Tasa último año (x 10 <sup>5</sup> ) |
|----------|-------------|-----------|-------|--------------------|--------------------|--------------------------------------|
| 1        | 1981        | 2003      | -0,9^ | -1,1               | -0,7               | 15661                                |
| 2        | 2003        | 2016      | -1,9^ | -2,4               | -1,5               | 11744                                |

Hombres 90-94:

| Segmento | Año inicial | Año final | CPA   | Límite inferior IC | Límite superior IC | Tasa último año (x 10 <sup>5</sup> ) |
|----------|-------------|-----------|-------|--------------------|--------------------|--------------------------------------|
| 1        | 1981        | 1984      | 3,5   | -1,7               | 9,0                | 27583                                |
| 2        | 1984        | 2004      | -0,7^ | -0,9               | -0,4               | 23939                                |
| 3        | 2004        | 2016      | -1,6^ | -2,1               | -1,1               | 20257                                |

Hombres 95 y más años:

| Segmento | Año inicial | Año final | CPA   | Límite inferior IC | Límite superior IC | Tasa último año (x 10 <sup>5</sup> ) |
|----------|-------------|-----------|-------|--------------------|--------------------|--------------------------------------|
| 1        | 1981        | 1986      | 0,2   | -1,9               | 2,4                | 29336                                |
| 2        | 1986        | 1990      | 6,6^  | 1,3                | 12,3               | 38145                                |
| 3        | 1990        | 1998      | 2,4^  | 1,1                | 3,6                | 44500                                |
| 4        | 1998        | 2001      | -6,9  | -17,4              | 4,9                | 36813                                |
| 5        | 2001        | 2004      | 1,4   | -10,1              | 14,2               | 36996                                |
| 6        | 2004        | 2016      | -2,5^ | -3,0               | -2,0               | 29460                                |

## 2) TENDENCIA DE LA MORTALIDAD GENERAL (TOTAL DE CAUSAS) EN MUJERES POR GRUPOS DE EDAD:

### Mujeres < 1 año:

| Segmento | Año inicial | Año final | CPA   | Límite inferior IC | Límite superior IC | Tasa último año (x 10 <sup>5</sup> ) |
|----------|-------------|-----------|-------|--------------------|--------------------|--------------------------------------|
| 1        | 1981        | 1985      | -6,9^ | -9,5               | -4,3               | 812                                  |
| 2        | 1985        | 1990      | -3,2^ | -5,8               | -0,5               | 711                                  |
| 3        | 1990        | 1996      | -6,7^ | -8,5               | -5,0               | 473                                  |
| 4        | 1996        | 2016      | -3,3^ | -3,5               | -3,1               | 233                                  |

### Mujeres 1-4 años:

| Segmento | Año inicial | Año final | CPA   | Límite inferior IC | Límite superior IC | Tasa último año (x 10 <sup>5</sup> ) |
|----------|-------------|-----------|-------|--------------------|--------------------|--------------------------------------|
| 1        | 1981        | 2016      | -4,0^ | -4,3               | -3,8               | 13                                   |

### Mujeres 5-9 años:

| Segmento | Año inicial | Año final | CPA   | Límite inferior IC | Límite superior IC | Tasa último año (x 10 <sup>5</sup> ) |
|----------|-------------|-----------|-------|--------------------|--------------------|--------------------------------------|
| 1        | 1981        | 2016      | -3,8^ | -4,0               | -3,5               | 6                                    |

### Mujeres 10-14 años:

| Segmento | Año inicial | Año final | CPA   | Límite inferior IC | Límite superior IC | Tasa último año (x 10 <sup>5</sup> ) |
|----------|-------------|-----------|-------|--------------------|--------------------|--------------------------------------|
| 1        | 1981        | 1998      | -2,2^ | -3,0               | -1,4               | 15                                   |
| 2        | 1998        | 2016      | -3,9^ | -4,7               | -3,2               | 7                                    |

### Mujeres 15-19 años:

| Segmento | Año inicial | Año final | CPA   | Límite inferior IC | Límite superior IC | Tasa último año (x 10 <sup>5</sup> ) |
|----------|-------------|-----------|-------|--------------------|--------------------|--------------------------------------|
| 1        | 1981        | 1990      | 1,5   | -0,7               | 3,6                | 35                                   |
| 2        | 1990        | 1994      | -9,5  | -19,4              | 1,6                | 23                                   |
| 3        | 1994        | 2000      | 1,6   | -3,5               | 7,0                | 26                                   |
| 4        | 2000        | 2016      | -5,2^ | -6,0               | -4,4               | 13                                   |

**Mujeres 20-24 años:**

| Segmento | Año inicial | Año final | CPA               | Límite inferior IC | Límite superior IC | Tasa último año (x 10 <sup>5</sup> ) |
|----------|-------------|-----------|-------------------|--------------------|--------------------|--------------------------------------|
| 1        | 1981        | 1991      | 2,3 <sup>^</sup>  | 0,9                | 3,6                | 45                                   |
| 2        | 1991        | 1997      | -8,1 <sup>^</sup> | -11,4              | -4,6               | 26                                   |
| 3        | 1997        | 2003      | -0,4              | -4,0               | 3,4                | 27                                   |
| 4        | 2003        | 2012      | -6,0 <sup>^</sup> | -7,6               | -4,2               | 16                                   |
| 5        | 2012        | 2016      | 0,4               | -4,7               | 5,8                | 16                                   |

**Mujeres 25-29 años:**

| Segmento | Año inicial | Año final | CPA               | Límite inferior IC | Límite superior IC | Tasa último año (x 10 <sup>5</sup> ) |
|----------|-------------|-----------|-------------------|--------------------|--------------------|--------------------------------------|
| 1        | 1981        | 1985      | -2,2              | -6,8               | 2,7                | 40                                   |
| 2        | 1985        | 1989      | 9,0 <sup>^</sup>  | 0,5                | 18,1               | 55                                   |
| 3        | 1989        | 1995      | -0,2              | -3,4               | 3,1                | 51                                   |
| 4        | 1995        | 1998      | -14,3             | -29,2              | 3,8                | 37                                   |
| 5        | 1998        | 2016      | -4,2 <sup>^</sup> | -4,6               | -3,8               | 18                                   |

**Mujeres 30-34 años:**

| Segmento | Año inicial | Año final | CPA                | Límite inferior IC | Límite superior IC | Tasa último año (x 10 <sup>5</sup> ) |
|----------|-------------|-----------|--------------------|--------------------|--------------------|--------------------------------------|
| 1        | 1981        | 1987      | -0,8               | -2,2               | 0,6                | 57                                   |
| 2        | 1987        | 1995      | 4,1 <sup>^</sup>   | 3,0                | 5,2                | 73                                   |
| 3        | 1995        | 1998      | -10,6 <sup>^</sup> | -19,5              | -0,9               | 49                                   |
| 4        | 1998        | 2009      | -5,3 <sup>^</sup>  | -5,9               | -4,7               | 29                                   |
| 5        | 2009        | 2016      | -3,5 <sup>^</sup>  | -4,5               | -2,4               | 24                                   |

**Mujeres 35-39 años:**

| Segmento | Año inicial | Año final | CPA               | Límite inferior IC | Límite superior IC | Tasa último año (x 10 <sup>5</sup> ) |
|----------|-------------|-----------|-------------------|--------------------|--------------------|--------------------------------------|
| 1        | 1981        | 1992      | 0,7               | -1,4               | 0,1                | 77                                   |
| 2        | 1992        | 1995      | 4,4               | -6,2               | 16,0               | 90                                   |
| 3        | 1995        | 1998      | -7,1              | -16,4              | 3,3                | 70                                   |
| 4        | 1998        | 2002      | -0,4              | -5,6               | 5,0                | 68                                   |
| 5        | 2002        | 2016      | -4,2 <sup>^</sup> | -4,7               | -3,8               | 40                                   |

**Mujeres 40-44 años:**

| Segmento | Año inicial | Año final | CPA   | Límite inferior IC | Límite superior IC | Tasa último año (x 10 <sup>5</sup> ) |
|----------|-------------|-----------|-------|--------------------|--------------------|--------------------------------------|
| 1        | 1981        | 1996      | -0,5^ | -0,8               | -0,2               | 120                                  |
| 2        | 1996        | 2007      | -1,7^ | -2,3               | -1,2               | 91                                   |
| 3        | 2007        | 2016      | -3,8^ | -4,4               | -3,2               | 66                                   |

**Mujeres 45-49 años:**

| Segmento | Año inicial | Año final | CPA   | Límite inferior IC | Límite superior IC | Tasa último año (x 10 <sup>5</sup> ) |
|----------|-------------|-----------|-------|--------------------|--------------------|--------------------------------------|
| 1        | 1981        | 1998      | -1,6^ | -1,9               | -1,4               | 153                                  |
| 2        | 1998        | 2003      | 0,9   | -1,3               | 3,1                | 164                                  |
| 3        | 2003        | 2016      | -2,3^ | -2,6               | -1,9               | 115                                  |

**Mujeres 50-54 años:**

| Segmento | Año inicial | Año final | CPA   | Límite inferior IC | Límite superior IC | Tasa último año (x 10 <sup>5</sup> ) |
|----------|-------------|-----------|-------|--------------------|--------------------|--------------------------------------|
| 1        | 1981        | 1985      | -2,6^ | -3,7               | -1,6               | 283                                  |
| 2        | 1985        | 1990      | -0,4  | -1,4               | 0,7                | 275                                  |
| 3        | 1990        | 1996      | -3,3^ | -4,0               | -2,6               | 229                                  |
| 4        | 1996        | 2005      | -0,8^ | -1,1               | -0,5               | 207                                  |
| 5        | 2005        | 2008      | 0,6   | -3,8               | 5,2                | 216                                  |
| 6        | 2008        | 2016      | -1,2^ | -1,5               | -0,9               | 195                                  |

**Mujeres 55-59 años:**

| Segmento | Año inicial | Año final | CPA   | Límite inferior IC | Límite superior IC | Tasa último año (x 10 <sup>5</sup> ) |
|----------|-------------|-----------|-------|--------------------|--------------------|--------------------------------------|
| 1        | 1981        | 1988      | -1,6^ | -2,1               | -1,1               | 426                                  |
| 2        | 1988        | 2000      | -2,4^ | -2,7               | -2,2               | 313                                  |
| 3        | 2000        | 2006      | -1,3^ | -2,1               | -0,4               | 287                                  |
| 4        | 2006        | 2016      | 0,1   | -0,2               | 0,4                | 288                                  |

**Mujeres 60-64 años:**

| Segmento | Año inicial | Año final | CPA   | Límite inferior IC | Límite superior IC | Tasa último año (x 10 <sup>5</sup> ) |
|----------|-------------|-----------|-------|--------------------|--------------------|--------------------------------------|
| 1        | 1981        | 2009      | -2,4^ | -2,5               | -2,3               | 409                                  |
| 2        | 2009        | 2016      | 0,4   | -0,3               | 1,1                | 413                                  |



### Mujeres 65-69 años:

| Segmento | Año inicial | Año final | CPA   | Límite inferior IC | Límite superior IC | Tasa último año (x 10 <sup>5</sup> ) |
|----------|-------------|-----------|-------|--------------------|--------------------|--------------------------------------|
| 1        | 1981        | 1985      | -1,5^ | -2,2               | -0,7               | 1247                                 |
| 2        | 1985        | 1992      | -3,0^ | -3,3               | -2,6               | 982                                  |
| 3        | 1992        | 2004      | -2,2^ | -2,4               | -2,1               | 756                                  |
| 4        | 2004        | 2010      | -3,6^ | -4,0               | -3,1               | 611                                  |
| 5        | 2010        | 2016      | -0,2  | -0,6               | 0,1                | 610                                  |

### Mujeres 70-74 años:

| Segmento | Año inicial | Año final | CPA   | Límite inferior IC | Límite superior IC | Tasa último año (x 10 <sup>5</sup> ) |
|----------|-------------|-----------|-------|--------------------|--------------------|--------------------------------------|
| 1        | 1981        | 1990      | -2,3^ | -2,5               | -2,0               | 1971                                 |
| 2        | 1990        | 1995      | -3,3^ | -4,3               | -2,3               | 1675                                 |
| 3        | 1995        | 1999      | -1,3  | -3,0               | 0,5                | 1596                                 |
| 4        | 1999        | 2013      | -3,0^ | -3,2               | -2,9               | 1018                                 |
| 5        | 2013        | 2016      | -1,2  | -3,1               | 0,6                | 989                                  |

### Mujeres 75-79 años:

| Segmento | Año inicial | Año final | CPA   | Límite inferior IC | Límite superior IC | Tasa último año (x 10 <sup>5</sup> ) |
|----------|-------------|-----------|-------|--------------------|--------------------|--------------------------------------|
| 1        | 1981        | 2004      | -2,3^ | -2,4               | -2,2               | 2618                                 |
| 2        | 2004        | 2010      | -3,5^ | -4,3               | -2,6               | 2173                                 |
| 3        | 2010        | 2016      | -1,8^ | -2,5               | -1,1               | 1916                                 |

### Mujeres 80-84 años:

| Segmento | Año inicial | Año final | CPA   | Límite inferior IC | Límite superior IC | Tasa último año (x 10 <sup>5</sup> ) |
|----------|-------------|-----------|-------|--------------------|--------------------|--------------------------------------|
| 1        | 1981        | 2000      | -1,9^ | -2,2               | -1,7               | 6054                                 |
| 2        | 2000        | 2016      | -2,5^ | -2,8               | -2,3               | 3968                                 |

### Mujeres 85-89 años:

| Segmento | Año inicial | Año final | CPA   | Límite inferior IC | Límite superior IC | Tasa último año (x 10 <sup>5</sup> ) |
|----------|-------------|-----------|-------|--------------------|--------------------|--------------------------------------|
| 1        | 1981        | 2003      | -1,4^ | -1,6               | -1,2               | 11835                                |
| 2        | 2003        | 2016      | -2,3^ | -2,7               | -1,8               | 8392                                 |

**Mujeres 90-94 años:**

| Segmento | Año inicial | Año final | CPA   | Límite inferior IC | Límite superior IC | Tasa último año (x 10 <sup>5</sup> ) |
|----------|-------------|-----------|-------|--------------------|--------------------|--------------------------------------|
| 1        | 1981        | 1985      | 2,0   | -0,6               | 4,6                | 25183                                |
| 2        | 1985        | 2005      | -1,0^ | -1,2               | -0,8               | 20589                                |
| 3        | 2005        | 2013      | -2,4^ | -3,3               | -1,5               | 16191                                |
| 4        | 2013        | 2016      | 1,0   | -3,3               | 5,6                | 16220                                |

**Mujeres 95 y más años:**

| Segmento | Año inicial | Año final | CPA   | Límite inferior IC | Límite superior IC | Tasa último año (x 10 <sup>5</sup> ) |
|----------|-------------|-----------|-------|--------------------|--------------------|--------------------------------------|
| 1        | 1981        | 1989      | 4,0^  | 3,1                | 4,8                | 36010                                |
| 2        | 1989        | 1998      | 1,6^  | 0,8                | 2,5                | 39701                                |
| 3        | 1998        | 2001      | -6,8  | -16,5              | 4,0                | 32996                                |
| 4        | 2001        | 2005      | 1,1   | -3,3               | 5,8                | 36027                                |
| 5        | 2005        | 2014      | -2,8^ | -3,6               | -2,0               | 26599                                |
| 6        | 2014        | 2016      | 3,5   | -7,8               | 16,2               | 27969                                |

### 3) TENDENCIA DE LA MORTALIDAD ESTANDARIZADA POR CAUSAS (GRANDES GRUPOS DE LA CIE-10) EN HOMBRES DE 60 A 79 AÑOS:

#### Tumores

| Segmento | Año inicial | Año final | CPA   | Límite inferior IC | Límite superior IC | Tasa último año (x 10 <sup>5</sup> ) |
|----------|-------------|-----------|-------|--------------------|--------------------|--------------------------------------|
| 1        | 1981        | 1986      | 2,0^  | 1,5                | 2,5                | 1065,78                              |
| 2        | 1986        | 1993      | 0,8^  | 0,5                | 1,2                | 1135,01                              |
| 3        | 1993        | 2001      | -0,6^ | -0,9               | -0,4               | 1091,29                              |
| 4        | 2001        | 2006      | -1,8^ | -2,5               | -1,2               | 984,14                               |
| 5        | 2006        | 2016      | -1,2^ | -1,4               | -1                 | 878,91                               |

#### Enfermedades del sistema circulatorio

| Segmento | Año inicial | Año final | CPA   | Límite inferior IC | Límite superior IC | Tasa último año (x 10 <sup>5</sup> ) |
|----------|-------------|-----------|-------|--------------------|--------------------|--------------------------------------|
| 1        | 1981        | 1989      | -3,7^ | -4,3               | -3,1               | 1155,88                              |
| 2        | 1989        | 1999      | -2,4^ | -2,9               | -1,9               | 920,41                               |
| 3        | 1999        | 2013      | -4,3^ | -4,6               | -4                 | 488,88                               |
| 4        | 2013        | 2016      | -1    | -3,6               | 1,6                | 469,9                                |

#### Enfermedades del sistema respiratorio

| Segmento | Año inicial | Año final | CPA   | Límite inferior IC | Límite superior IC | Tasa último año (x 10 <sup>5</sup> ) |
|----------|-------------|-----------|-------|--------------------|--------------------|--------------------------------------|
| 1        | 1981        | 1999      | -0,9^ | -1,2               | -0,6               | 387,42                               |
| 2        | 1999        | 2011      | -4,2^ | -4,8               | -3,5               | 209                                  |
| 3        | 2011        | 2016      | -1,2  | -3,6               | 1,3                | 192,06                               |

#### Enfermedades del sistema digestivo

| Segmento | Año inicial | Año final | CPA   | Límite inferior IC | Límite superior IC | Tasa último año (x 10 <sup>5</sup> ) |
|----------|-------------|-----------|-------|--------------------|--------------------|--------------------------------------|
| 1        | 1981        | 1987      | -1,4^ | -2,2               | -0,7               | 229,75                               |
| 2        | 1987        | 2013      | -2,9^ | -3                 | -2,8               | 102,43                               |
| 3        | 2013        | 2016      | -0,5  | -2,7               | 1,9                | 103,8                                |

#### Enfermedades del sistema nervioso y de los órganos de los sentidos

| Segmento | Año inicial | Año final | CPA  | Límite inferior IC | Límite superior IC | Tasa último año (x 10 <sup>5</sup> ) |
|----------|-------------|-----------|------|--------------------|--------------------|--------------------------------------|
| 1        | 1981        | 2001      | 3,4^ | 3,1                | 3,8                | 68,4                                 |
| 2        | 2001        | 2016      | 0,8^ | 0,3                | 1,3                | 74,62                                |

#### Enfermedades endocrinas, nutricionales y metabólicas

| Segmento | Año inicial | Año final | CPA   | Límite inferior IC | Límite superior IC | Tasa último año (x 10 <sup>5</sup> ) |
|----------|-------------|-----------|-------|--------------------|--------------------|--------------------------------------|
| 1        | 1981        | 2016      | -1,7^ | -1,8               | -1,5               | 49,16                                |

Causas externas

| Segmento | Año inicial | Año final | CPA   | Límite inferior IC | Límite superior IC | Tasa último año (x 10 <sup>5</sup> ) |
|----------|-------------|-----------|-------|--------------------|--------------------|--------------------------------------|
| 1        | 1981        | 1989      | 1,4^  | 0,6                | 2,1                | 109,55                               |
| 2        | 1989        | 1993      | -5,3^ | -8,5               | -2                 | 86,52                                |
| 3        | 1993        | 2005      | -0,6^ | -1,1               | -0,2               | 82,19                                |
| 4        | 2005        | 2010      | -5,2^ | -7,3               | -3,2               | 62,66                                |
| 5        | 2010        | 2016      | 0     | -1,2               | 1,2                | 64,5                                 |

Trastornos mentales y del comportamiento

| Segmento | Año inicial | Año final | CPA   | Límite inferior IC | Límite superior IC | Tasa último año (x 10 <sup>5</sup> ) |
|----------|-------------|-----------|-------|--------------------|--------------------|--------------------------------------|
| 1        | 1981        | 1986      | 15,4^ | 12,8               | 18,1               | 19,06                                |
| 2        | 1986        | 1991      | 11,8^ | 8,2                | 15,5               | 32,72                                |
| 3        | 1991        | 1998      | 3,1^  | 1,4                | 4,8                | 42,26                                |
| 4        | 1998        | 2001      | -7,3  | -20,5              | 8,1                | 33,26                                |
| 5        | 2001        | 2010      | -1,2^ | -2,2               | -0,2               | 29,65                                |
| 6        | 2010        | 2016      | 2,4^  | 0,7                | 4,1                | 32,98                                |

Resto de causas de mortalidad

| Segmento | Año inicial | Año final | CPA   | Límite inferior IC | Límite superior IC | Tasa último año (x 10 <sup>5</sup> ) |
|----------|-------------|-----------|-------|--------------------|--------------------|--------------------------------------|
| 1        | 1981        | 1985      | -1,8  | -4,6               | 1,1                | 266,15                               |
| 2        | 1985        | 1994      | -5,6^ | -6,5               | -4,6               | 150,88                               |
| 3        | 1994        | 2005      | -0,4  | -1,1               | 0,3                | 149,73                               |
| 4        | 2005        | 2016      | -2,5^ | -3,1               | -1,9               | 104,36                               |

#### 4) TENDENCIA DE LA MORTALIDAD ESTANDARIZADA POR CAUSAS (GRANDES GRUPOS DE LA CIE-10) EN MUJERES DE 60 A 79 AÑOS:

##### Tumores

| Segmento | Año inicial | Año final | CPA   | Límite inferior IC | Límite superior IC | Tasa último año (x 10 <sup>5</sup> ) |
|----------|-------------|-----------|-------|--------------------|--------------------|--------------------------------------|
| 1        | 1981        | 1985      | -1,8  | -4,6               | 1,1                | 266,15                               |
| 2        | 1985        | 1994      | -5,6^ | -6,5               | -4,6               | 150,88                               |
| 3        | 1994        | 2005      | -0,4  | -1,1               | 0,3                | 149,73                               |
| 4        | 2005        | 2016      | -2,5^ | -3,1               | -1,9               | 104,36                               |

##### Enfermedades del sistema circulatorio

| Segmento | Año inicial | Año final | CPA   | Límite inferior IC | Límite superior IC | Tasa último año (x 10 <sup>5</sup> ) |
|----------|-------------|-----------|-------|--------------------|--------------------|--------------------------------------|
| 1        | 1981        | 2004      | -4,2^ | -4,3               | -4,1               | 371,19                               |
| 2        | 2004        | 2011      | -5,6^ | -6,4               | -4,9               | 251,22                               |
| 3        | 2011        | 2016      | -3,3^ | -4,3               | -2,3               | 212,17                               |

##### Enfermedades del sistema respiratorio

| Segmento | Año inicial | Año final | CPA   | Límite inferior IC | Límite superior IC | Tasa último año (x 10 <sup>5</sup> ) |
|----------|-------------|-----------|-------|--------------------|--------------------|--------------------------------------|
| 1        | 1981        | 1995      | -3,3^ | -3,8               | -2,8               | 99,93                                |
| 2        | 1995        | 1999      | 1,5   | -5,3               | 8,8                | 114,39                               |
| 3        | 1999        | 2011      | -3,9^ | -4,6               | -3,1               | 63                                   |
| 4        | 2011        | 2016      | 1,2   | -1,6               | 4                  | 66,93                                |

##### Enfermedades del sistema digestivo

| Segmento | Año inicial | Año final | CPA   | Límite inferior IC | Límite superior IC | Tasa último año (x 10 <sup>5</sup> ) |
|----------|-------------|-----------|-------|--------------------|--------------------|--------------------------------------|
| 1        | 1981        | 1989      | -1,5^ | -1,9               | -1,1               | 100,85                               |
| 2        | 1989        | 1998      | -2,4^ | -2,8               | -2,1               | 83,46                                |
| 3        | 1998        | 2013      | -3,5^ | -3,7               | -3,4               | 47,33                                |
| 4        | 2013        | 2016      | 0,3   | -2,6               | 2                  | 44,87                                |

##### Enfermedades del sistema nervioso y de los órganos de los sentidos

| Segmento | Año inicial | Año final | CPA  | Límite inferior IC | Límite superior IC | Tasa último año (x 10 <sup>5</sup> ) |
|----------|-------------|-----------|------|--------------------|--------------------|--------------------------------------|
| 1        | 1981        | 1984      | -1,6 | -8,4               | 5,7                | 22,33                                |
| 2        | 1984        | 2002      | 5,1^ | 4,6                | 5,6                | 54,9                                 |
| 3        | 2002        | 2016      | 0,1  | -0,6               | 0,8                | 58,39                                |

### Enfermedades endocrinas, nutricionales y metabólicas

| Segmento | Año inicial | Año final | CPA   | Límite inferior IC | Límite superior IC | Tasa último año (x 10 <sup>5</sup> ) |
|----------|-------------|-----------|-------|--------------------|--------------------|--------------------------------------|
| 1        | 1981        | 1986      | -0,3  | -1,4               | 0,8                | 112,05                               |
| 2        | 1986        | 1997      | -4,7^ | -5                 | -4,3               | 63,85                                |
| 3        | 1997        | 2010      | -3,5^ | -3,8               | -3,2               | 42,03                                |
| 4        | 2010        | 2013      | -6,6^ | -12,2              | -0,6               | 33,02                                |
| 5        | 2013        | 2016      | -1,8  | -4,4               | 0,9                | 30,81                                |

### Causas externas

| Segmento | Año inicial | Año final | CPA   | Límite inferior IC | Límite superior IC | Tasa último año (x 10 <sup>5</sup> ) |
|----------|-------------|-----------|-------|--------------------|--------------------|--------------------------------------|
| 1        | 1981        | 1989      | -0,4  | -1,5               | 0,8                | 45,69                                |
| 2        | 1989        | 1992      | -6,8  | -16,1              | 3,5                | 35,18                                |
| 3        | 1992        | 2004      | -0,8^ | -1,5               | -0,1               | 32,87                                |
| 4        | 2004        | 2010      | -4,7^ | -6,9               | -2,4               | 24,64                                |
| 5        | 2010        | 2016      | 1,2   | -0,5               | 3,1                | 27,13                                |

### Trastornos mentales y del comportamiento

| Segmento | Año inicial | Año final | CPA   | Límite inferior IC | Límite superior IC | Tasa último año (x 10 <sup>5</sup> ) |
|----------|-------------|-----------|-------|--------------------|--------------------|--------------------------------------|
| 1        | 1981        | 1991      | 16,5^ | 14,4               | 18,5               | 30,85                                |
| 2        | 1991        | 1997      | 1     | -3,9               | 6,3                | 31,8                                 |
| 3        | 1997        | 2006      | -5,6^ | -7,9               | -3,2               | 19,68                                |
| 4        | 2006        | 2016      | 0,9   | -0,9               | 2,6                | 20,32                                |

### Resto de causas de mortalidad

| Segmento | Año inicial | Año final | CPA   | Límite inferior IC | Límite superior IC | Tasa último año (x 10 <sup>5</sup> ) |
|----------|-------------|-----------|-------|--------------------|--------------------|--------------------------------------|
| 1        | 1981        | 1985      | 0,1   | -2,6               | 2,9                | 163,45                               |
| 2        | 1985        | 1994      | -5,1^ | -6                 | -4,2               | 97,36                                |
| 3        | 1994        | 2003      | -0,2  | -1,2               | 0,7                | 98,4                                 |
| 4        | 2003        | 2016      | -2,6^ | -3                 | -2,1               | 66,6                                 |

**5) TENDENCIA DE LA MORTALIDAD ESTANDARIZADA POR CAUSAS (GRANDES GRUPOS DE LA CIE-10) EN HOMBRES DE 15 a 39 AÑOS:**

**Tumores**

| Segmento | Año inicial | Año final | CPA   | Límite inferior IC | Límite superior IC | Tasa último año (x 10 <sup>5</sup> ) |
|----------|-------------|-----------|-------|--------------------|--------------------|--------------------------------------|
| 1        | 1981        | 1985      | -0,5  | -2,5               | 1,4                | 16,35                                |
| 2        | 1985        | 1988      | 3,4   | -4,4               | 11,8               | 18,63                                |
| 3        | 1988        | 1996      | -2,2^ | -2,9               | -1,5               | 15,39                                |
| 4        | 1996        | 2009      | -4,2^ | -4,5               | -3,9               | 9,08                                 |
| 5        | 2009        | 2016      | -1,1^ | -1,8               | -0,3               | 8,1                                  |

**Enfermedades del sistema circulatorio**

| Segmento | Año inicial | Año final | CPA   | Límite inferior IC | Límite superior IC | Tasa último año (x 10 <sup>5</sup> ) |
|----------|-------------|-----------|-------|--------------------|--------------------|--------------------------------------|
| 1        | 1981        | 1992      | -1,1^ | -1,7               | -0,6               | 15,35                                |
| 2        | 1992        | 1996      | -6,7^ | -11,2              | -2,1               | 11,76                                |
| 3        | 1996        | 2004      | -3,7^ | -4,7               | -2,6               | 8,87                                 |
| 4        | 2004        | 2014      | -5,3^ | -6                 | -4,6               | 4,99                                 |
| 5        | 2014        | 2016      | 8,2   | -3,9               | 21,7               | 5,83                                 |

**Enfermedades del sistema respiratorio**

| Segmento | Año inicial | Año final | CPA   | Límite inferior IC | Límite superior IC | Tasa último año (x 10 <sup>5</sup> ) |
|----------|-------------|-----------|-------|--------------------|--------------------|--------------------------------------|
| 1        | 1981        | 1984      | -4,8  | -13,2              | 4,4                | 4,59                                 |
| 2        | 1984        | 1991      | 7,7^  | 4,7                | 10,8               | 7,03                                 |
| 3        | 1991        | 1997      | -8,8^ | -12,2              | -5,2               | 4,21                                 |
| 4        | 1997        | 2008      | -2,9^ | -4,2               | -1,7               | 3                                    |
| 5        | 2008        | 2013      | -9,9^ | -14,8              | -4,8               | 1,86                                 |
| 6        | 2013        | 2016      | 2,5   | -6,5               | 12,4               | 1,97                                 |

**Enfermedades del sistema digestivo**

| Segmento | Año inicial | Año final | CPA    | Límite inferior IC | Límite superior IC | Tasa último año (x 10 <sup>5</sup> ) |
|----------|-------------|-----------|--------|--------------------|--------------------|--------------------------------------|
| 1        | 1981        | 1990      | -0,2   | -1,2               | 0,8                | 8,32                                 |
| 2        | 1990        | 1996      | -3,9^  | -6,3               | -1,4               | 6,34                                 |
| 3        | 1996        | 1999      | -11,6  | -23,7              | 2,5                | 4,33                                 |
| 4        | 1999        | 2002      | -3,2   | -16,5              | 12,2               | 3,83                                 |
| 5        | 2002        | 2013      | -10,2^ | -10,9              | -9,4               | 1,1                                  |
| 6        | 2013        | 2016      | -3,5   | -9,5               | 2,9                | 1,13                                 |

### Enfermedades del sistema nervioso y de los órganos de los sentidos

| Segmento | Año inicial | Año final | CPA   | Límite inferior IC | Límite superior IC | Tasa último año (x 10 <sup>5</sup> ) |
|----------|-------------|-----------|-------|--------------------|--------------------|--------------------------------------|
| 1        | 1981        | 1988      | 0,3   | -1,7               | 2,3                | 2,77                                 |
| 2        | 1988        | 1991      | 8,1   | -14,3              | 36,5               | 3,92                                 |
| 3        | 1991        | 1995      | -8,3  | -16,1              | 0,2                | 2,54                                 |
| 4        | 1995        | 1999      | 2,5   | -6,2               | 12,1               | 3,19                                 |
| 5        | 1999        | 2016      | -1,6^ | -2,1               | -1,1               | 2,23                                 |

### Enfermedades endocrinas, nutricionales y metabólicas

| Segmento | Año inicial | Año final | CPA   | Límite inferior IC | Límite superior IC | Tasa último año (x 10 <sup>5</sup> ) |
|----------|-------------|-----------|-------|--------------------|--------------------|--------------------------------------|
| 1        | 1981        | 2016      | -2,0^ | -2,5               | -1,5               | 0,66                                 |

### Causas externas

| Segmento | Año inicial | Año final | CPA    | Límite inferior IC | Límite superior IC | Tasa último año (x 10 <sup>5</sup> ) |
|----------|-------------|-----------|--------|--------------------|--------------------|--------------------------------------|
| 1        | 1981        | 1990      | 5,6^   | 4,6                | 6,7                | 85,03                                |
| 2        | 1990        | 1994      | -6,2^  | -11,1              | -1,1               | 67,29                                |
| 3        | 1994        | 2004      | -2,1^  | -3,1               | -1,2               | 51,67                                |
| 4        | 2004        | 2012      | -10,5^ | -11,8              | -9,3               | 23,31                                |
| 5        | 2012        | 2016      | -1,1   | -4,4               | 2,2                | 21,65                                |

### Trastornos mentales y del comportamiento

| Segmento | Año inicial | Año final | CPA    | Límite inferior IC | Límite superior IC | Tasa último año (x 10 <sup>5</sup> ) |
|----------|-------------|-----------|--------|--------------------|--------------------|--------------------------------------|
| 1        | 1981        | 1991      | 5,1^   | 2,6                | 7,7                | 1,45                                 |
| 2        | 1991        | 2000      | -8,5^  | -11,5              | -5,3               | 0,6                                  |
| 3        | 2000        | 2003      | 41,7   | -15                | 136,1              | 1,64                                 |
| 4        | 2003        | 2007      | -26,5^ | -39,3              | -11                | 0,42                                 |
| 5        | 2007        | 2016      | -13,4^ | -15,8              | -10,9              | 0,12                                 |

### Resto de causas de mortalidad

| Segmento | Año inicial | Año final | CPA   | Límite inferior IC | Límite superior IC | Tasa último año (x 10 <sup>5</sup> ) |
|----------|-------------|-----------|-------|--------------------|--------------------|--------------------------------------|
| 1        | 1981        | 2016      | -2,2^ | -2,7               | -1,7               | 5,37                                 |
